# Supplementary material for: Boosted charge transfer in Pt cluster anchored TiO2 microspheres with rich oxygen vacancies for solar driven H2 production from lignocellulosic biomass
Source: Royal Society of Chemistry journal article supplement (doi:10.1039/d3qi01894f), 2023-01-01
Supplement: d3qi01894f1.pdf [file d3qi01894f1.pdf]

## Supporting Information

# Boosted charge transfer in Pt clusters anchored TiO<sub>2</sub> microspheres with rich oxygen vacancies for solar driven H<sub>2</sub> production from lignocellulosic biomass

*Fu-Guang Zhang<sup>a, †</sup>, Miao Cheng<sup>b, †</sup>, Yong-Jun Yuan<sup>a, \*</sup>, Qing-Yu Liu<sup>a</sup>, Quan Cheng<sup>a</sup>, Jie Guan<sup>c, \*</sup>*

<sup>a</sup>College of Materials and Environmental Engineering, Hangzhou Dianzi University, Hangzhou 310018, People's Republic of China.

<sup>b</sup>School of Chemistry and Chemical Engineering, Southeast University, Nanjing 211189, People's Republic of China.

<sup>c</sup>School of Physics, Southeast University, Nanjing 211189, People's Republic of China.

<sup>†</sup>These authors contributed equally to this work.

\*E-mail: yjyuan@hdu.edu.cn; guanjie@seu.edu.cn.

## **Experimental**

### **Synthesis of porous TiO<sub>2</sub> microspheres.**

Porous TiO<sub>2</sub> microspheres were prepared through a solvothermal method. In a typical preparation, titanium solution was prepared by dispersing of 3 ml of titanium isopropoxide in 30 ml of anhydrous acetone to obtain an orange transparent solution. After stirring for 10 minutes, the mixture solution was transferred into a 50 ml Teflon-lined stainless-steel autoclave which was heated at 200 °C for 4 h in an oven. After cooling to room temperature, the produced precipitate was collected by centrifugation at 4000 rpm and fully washed with deionized water and anhydrous acetone to remove impurity. The product was dried at 60° in vacuum drying oven. The white product was finally heated at 400 °C for 4 h under air atmosphere to remove the surface organic compounds.

### **Synthesis of Pt/TiO<sub>2</sub> photocatalyst.**

In a typical synthesis of Pt/TiO<sub>2</sub> photocatalyst, 500 mg of as-synthesized TiO<sub>2</sub> microspheres was added in 100 mL deionized water and ultrasonically dispersed for 60 minutes to obtain a uniformly dispersed suspension solution. And then 2.5 mL of 2 mg·mL<sup>-1</sup> K<sub>2</sub>PtCl<sub>6</sub> solution was added into the above suspension solution, which was kept dark environment at 0 °C in an ice-bath with magnetic stirring for 4 h. The product was collected by centrifugation at 5000 rpm, then washed with deionized water and absolute ethanol, and finally dried at room temperature in vacuum drying oven to obtain faint yellow 1.0% Pt/TiO<sub>2</sub> photocatalyst. In addition, the 0.2%, 0.4%, 0.6%, 0.8% Pt/TiO<sub>2</sub> photocatalyst, respectively, were also synthesized through the same process except using 0.5, 1.0, 1.5 and 2.0 mL of 2 mg·mL<sup>-1</sup> K<sub>2</sub>PtCl<sub>6</sub> solution instead of 2.5 mL K<sub>2</sub>PtCl<sub>6</sub> aqueous solution.

### **Photocatalytic lignocellulosic biomass-to-H<sub>2</sub> conversion experiments.**

The photocatalytic lignocellulosic biomass-to-H<sub>2</sub> conversion experiments were performed under UV-Vis light irradiation (300 W Xe lamp, Shenyang Yilida Technology Co., LTD) in a 350 ml Pyrex photoreactor with a top window which connected to a closed gas-circulating vacuum system. Typically, 100 mg Pt/TiO<sub>2</sub>

photocatalyst and 1g substance are added in a 250 ml of aqueous solution and ultrasonically dispersed for 30 minutes in the photoreactor. The lignocellulosic biomass including rice straw, wheat straw, polar wood chip, bamboo, rice hull and corncob were sieved on 80 mesh sifter, and the lignocellulosic biomass with size less than 180  $\mu\text{m}$  were used as substance for photocatalytic reaction. Prior to irradiation, the suspension solution was degassed to remove residual air. The temperature of photocatalytic  $\text{H}_2$  production system was maintained at room temperature in the presence of a flow of cooling water. The evolved  $\text{H}_2$  was analyzed by an on-line GC1690 gas chromatography with a TCD detector (Jiedao, 5  $\text{\AA}$  molecular sieves column, Ar as the carrier gas). For outdoor photocatalytic  $\text{H}_2$  production experiments, the reaction solution was transferred into a sealed glass reactor, and the outdoor sunlight was used as light source. The evolved gas (1.0 ml) extracted from the headspace of reactor was injected into the GC to analyze the amount of  $\text{H}_2$ . The photocatalytic  $\text{H}_2$  production experiment for the measurement of apparent quantum efficiency (AQY) was conducted by the same process except using monochromatic light filter, and the AQY was calculated according to the following equations:

$$n_{\text{photons}} = \frac{P\lambda}{hc} \times t \quad (1)$$

$$\begin{aligned} \text{AQY}[\%] &= \frac{\text{number of reacted electrons}}{\text{number of incident photons}} \times 100 \\ &= \frac{2 \times \text{number of evolved } \text{H}_2 \text{ molecules}}{\text{number of incident photons}} \times 100 \quad (2) \end{aligned}$$

where  $P$ ,  $\lambda$ ,  $h$ ,  $c$  and  $t$  is the input optical power, wavelength of the light, Planck's constant, speed of light and the illumination time, respectively.

**Characterization.** The crystalline structure of photocatalyst was examined with a Rigaku-miniflex 6 X-ray diffractometer (Japan) equipped with Cu  $K\alpha$  ( $\lambda = 0.15406$  nm) radiation. The Raman spectra were recorded on a J-Y T64000 Raman spectrometer equipped with 532 nm wavelength incident laser light. The morphology of materials was characterized on a field emission Hitachi S-4800 scanning electron microscope and JEOL JEM 2010 transmission electron microscope. Apherical aberration-corrected HAADF-STEM and EDX elemental mapping images of Pt/TiO<sub>2</sub> were performed by a JEOL JEM-ARM200F ARM electron microscope. The specific

surface area of sample was obtained from nitrogen adsorption-desorption isotherms measured at 77 K using a Micromeritics ASAP 2460 apparatus, the BET surface area was calculated from the adsorption data, and the pore distribution was calculated by the Barret-Joyner-Halenda method. The optical properties of photocatalysts were assessed by using Varian Cary 500 UV-vis spectrophotometer by using BaSO<sub>4</sub> as the background. The XPS measurements were analyzed on a Thermo ESCALAB 250XI XPS system with Al K $\alpha$  X-ray source. Transient photocurrent measurements were carried out a standard three-electrode system with a saturated Ag/AgCl electrode as the reference electrode, Pt wire as the counter electrode and sample-coated ITO glass as working electrode using a CHI660E electrochemical workstation (Shanghai Chenhua Limited, China) with an external voltage of 0.5 V vs. RHE. A 0.5 M Na<sub>2</sub>SO<sub>4</sub> aqueous solution was used as electrolyte, and all measured potentials (vs. AgCl/Ag) were converted to the potentials versus the RHE. The working electrode was prepared by coating the suspension solution of photocatalyst (1 mg·ml<sup>-1</sup>) on the ITO glass, and dried at room temperature. The LSV plots were performed in 0.5 M H<sub>2</sub>SO<sub>4</sub> aqueous solution in standard three-electrode system as described above expect the use of sample coated platinized carbon electrode as the working electrode. For the CO<sub>2</sub> detection, 1 ml gas extracted from the reaction system was detected by a carbon dioxide analyzer (AR8200, Smart Sensor, China). The high performance liquid chromatography (HPLC) analysis was performed on an Agilent HPLC 1260 chromatographic instrument. The total organic carbon (TOC) analysis of solution was carried on a Vario TOC analyzer (Elementar, Germany).

### **Theoretical methods**

All our first principles calculations were carried out within the framework of density functional theory (DFT) as implemented in “Vienna ab initio simulation package” (VASP).<sup>[1,2]</sup> Perdew-Burke-Ernzerhof (PBE) exchange-correlation functional were used and the van der Waals (vdW) force was also considered with the usage of DFT-D3 method.<sup>[3,4]</sup> Projector-augmented-wave (PAW) pseudopotentials and a plane-wave basis set with cutoff energy of 500 eV were used.<sup>[5,6]</sup> A vacuum spacing of 20 Å was employed to eliminate the interactions between layers. A total

energy difference between subsequent self-consistency iterations below  $10^{-5}$  eV is used as the criterion for reaching self-consistency. All geometries have been optimized using the conjugate-gradient (CG) method,<sup>[7]</sup> until none of the residual Hellmann-Feynman forces exceeded  $10^{-2}$  eV/Å. The Gaussian smearing width was set to 0.1 eV. A  $4 \times 4$  supercell slab consisting of 96 atoms was used in this study to represent the anatase TiO<sub>2</sub> (101) surface. The Brillouin zone was sampled with a  $3 \times 3 \times 1$  Monkhorst-Pack grid.<sup>[8]</sup>

Gibbs free energy change ( $\Delta G$ ) of each chemical reaction step was calculated by:

$$\Delta G = \Delta E_{DFT} + \Delta E_{ZPE} - T\Delta S,$$

where  $\Delta E_{DFT}$ ,  $\Delta E_{ZPE}$ ,  $T$ , and  $S$  denote the calculated total energy, zero-point energy, temperature, and entropy, respectively. Adsorption energy  $\Delta E_{DFT}$  on the surface of substrates was defined as:

$$\Delta E_{DFT} = E_{-*H_2O} - (E_{-*} + E_{-(H_2O)}),$$

where  $E_{-*H_2O}$ ,  $E_{-*}$ , and  $E_{-(H_2O)}$  denote the total energies of H<sub>2</sub>O molecule attached on substrates, bare substrates, and isolated H<sub>2</sub>O molecule. The zero-point energy and entropy were calculated using VASPKIT code.<sup>[9]</sup>

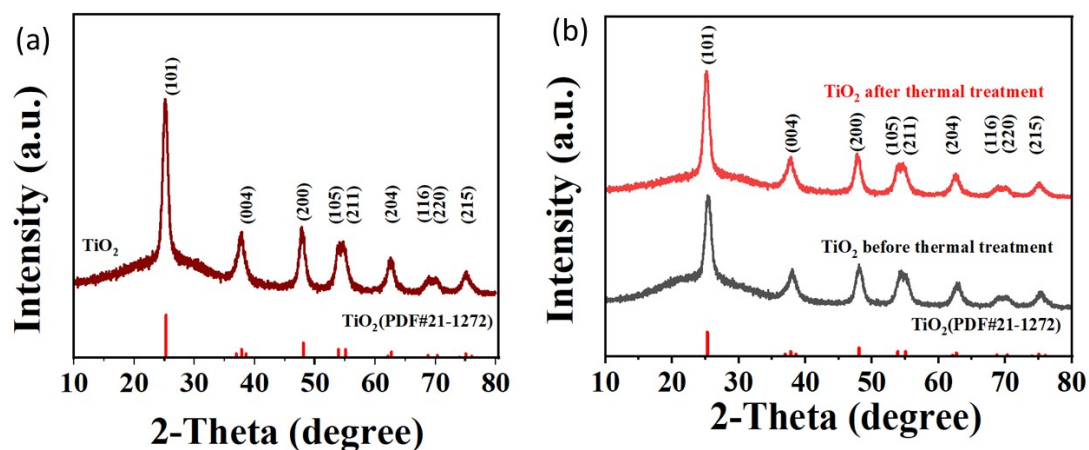

**Figure S1.** (a) XRD pattern of bare TiO<sub>2</sub> prepared from solvothermal reaction. (b) XRD pattern of bare TiO<sub>2</sub> before and after thermal treatment at 400 °C for 4h under air atmosphere

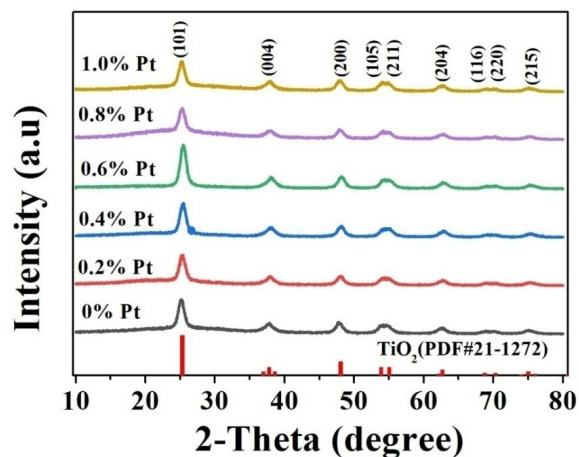

**Figure S2.** XRD pattern of bare TiO<sub>2</sub> and Pt/TiO<sub>2</sub> photocatalysts loaded with various Pt nanoclusters.

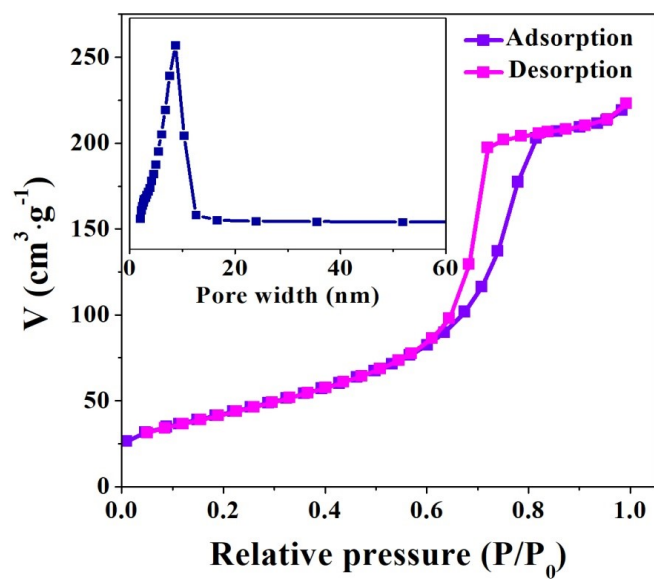

**Figure S3.** N<sub>2</sub> adsorption-desorption curve of as-prepared porous TiO<sub>2</sub> microspheres, the inset is the BJH pore size distribution.

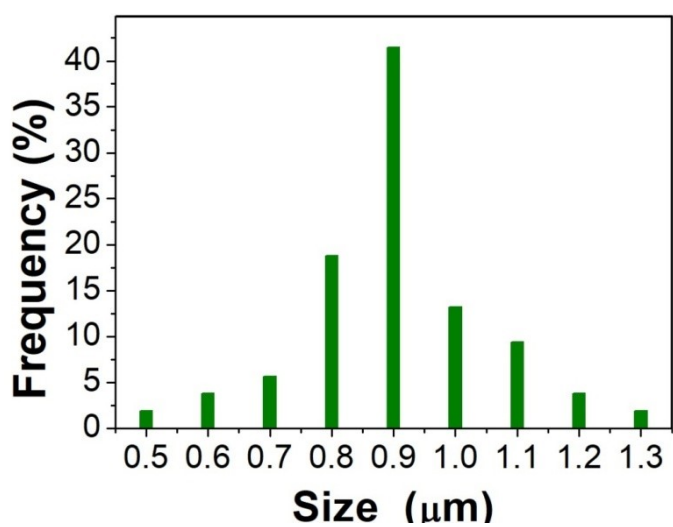

**Figure S4.** The size distribution of bare TiO<sub>2</sub> microspheres obtained from Figure 1b.

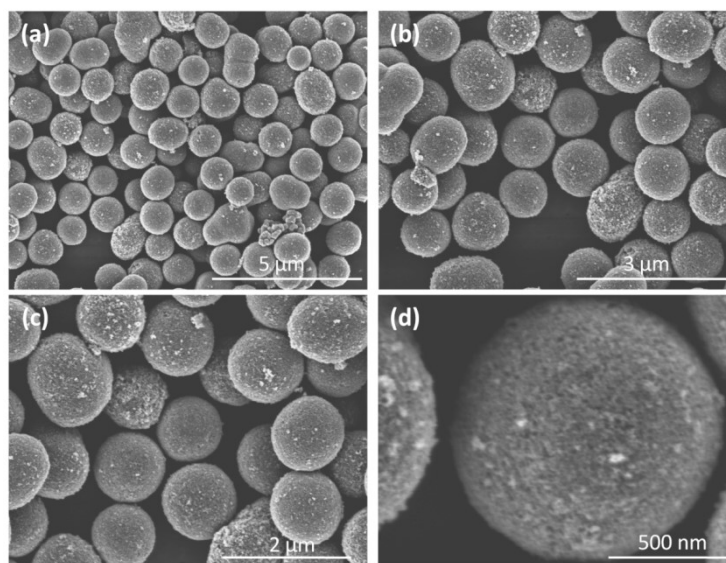

**Figure S5.** SEM images of bare TiO<sub>2</sub> obtained from solvothermal reaction.

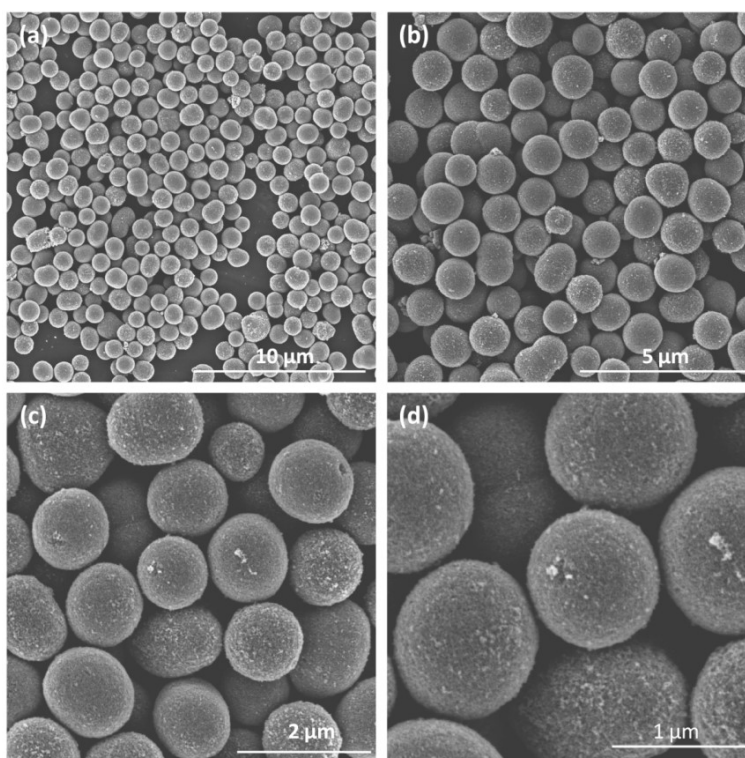

**Figure S6.** SEM images of bare TiO<sub>2</sub> after thermal treatment at 400 °C for 4h under air atmosphere.



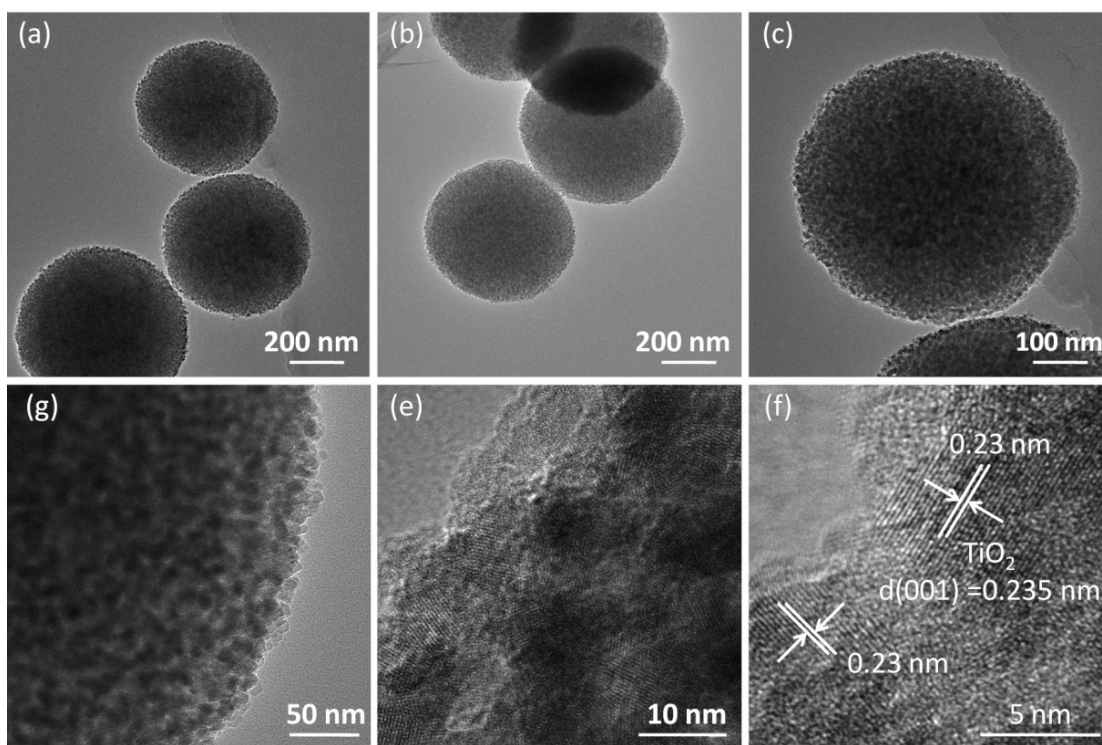

**Figure S7.** (a-e) TEM and (f) high resolution TEM images of bare  $\text{TiO}_2$  microsphere.

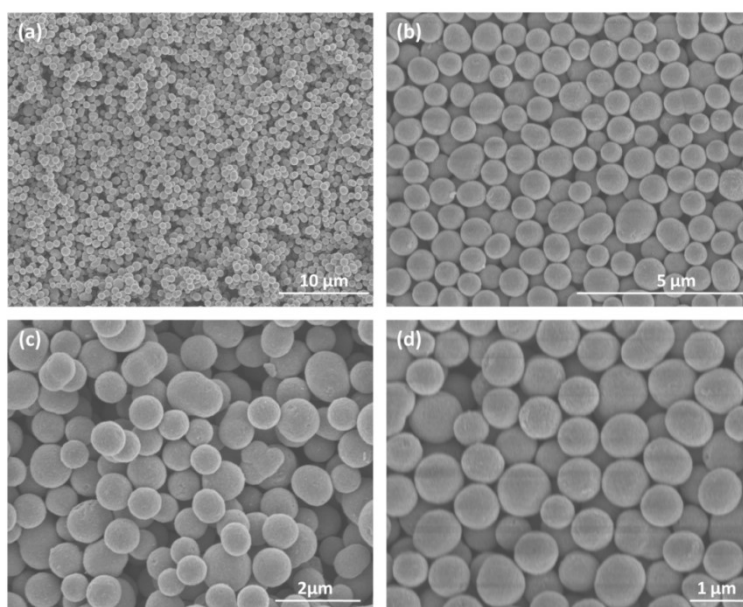

**Figure S8.** (a-d) SEM images of 0.4% Pt/ $\text{TiO}_2$  photocatalyst.

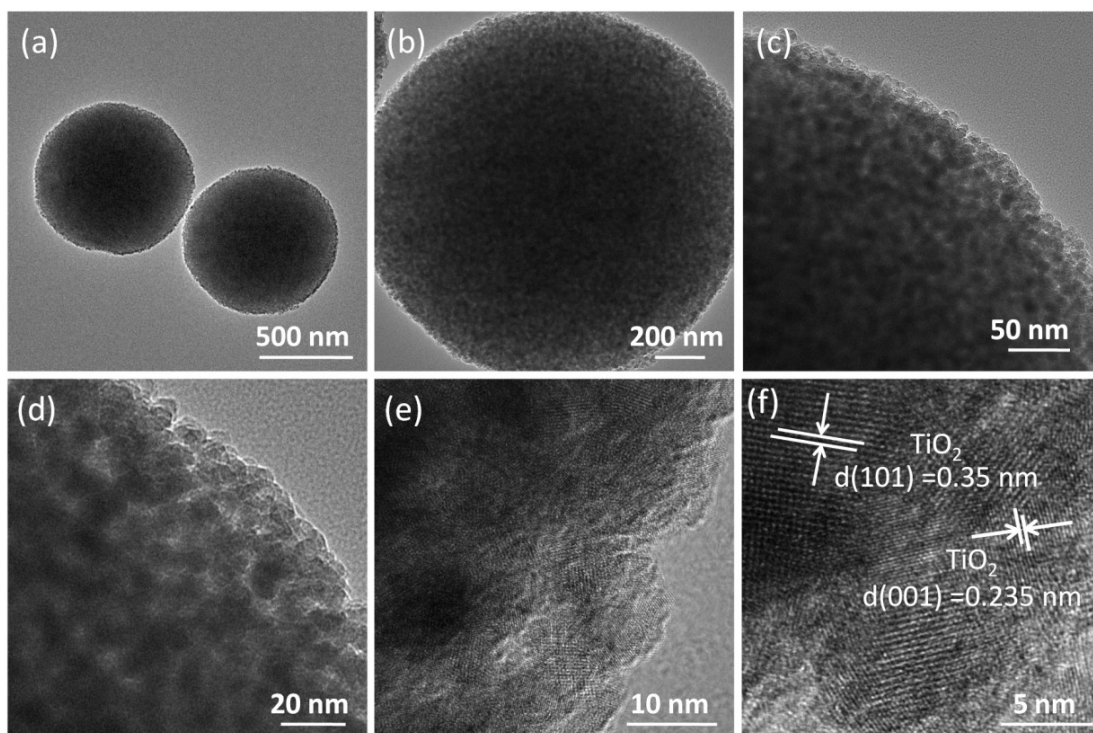

**Figure S9.** (a-e) TEM and high resolution TEM images (f) of 0.4% Pt/TiO<sub>2</sub> photocatalyst.

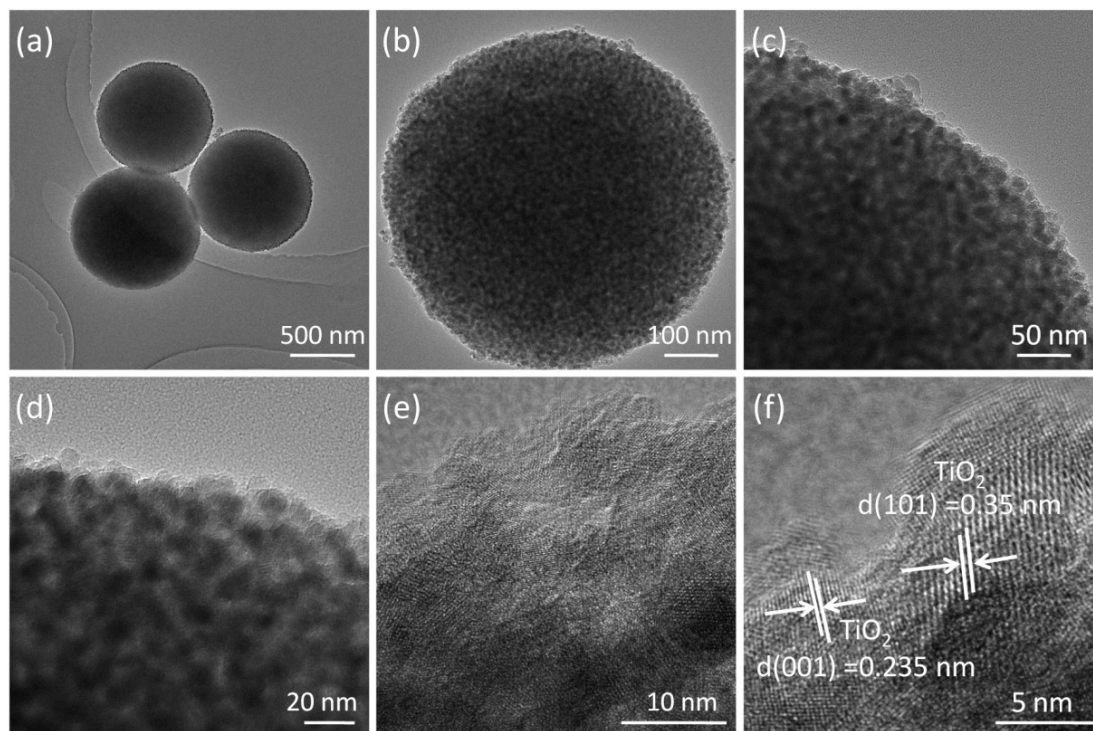

**Figure S10.** (a-e) TEM and (f) high resolution TEM image of 0.6% Pt/TiO<sub>2</sub> photocatalyst.

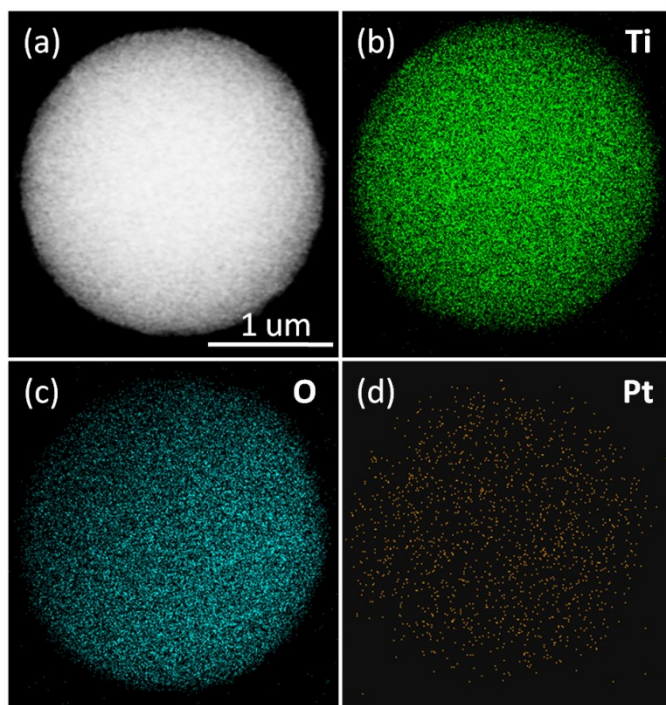

**Figure S11.** (a-d) HADDF image of 0.4% Pt/TiO<sub>2</sub> and corresponding elemental mapping for Ti (b), O (c) and P (d).

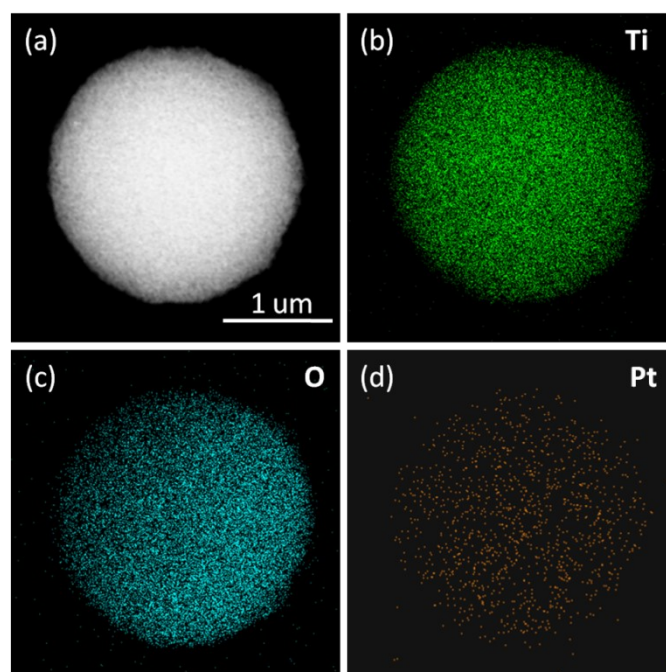

**Figure S12.** (a-d) HADDF image of 0.6% Pt/TiO<sub>2</sub> and corresponding elemental mapping for Ti (b), O (c) and P (d).

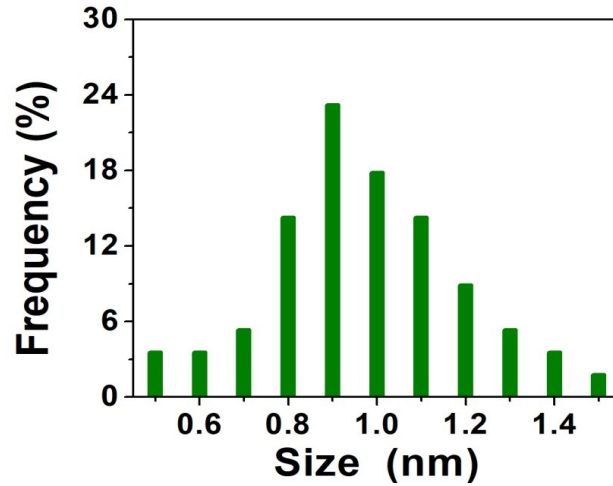

**Figure S13.** The size distribution of Pt in 0.4% Pt/TiO<sub>2</sub> photocatalyst obtained from Figure 2e.

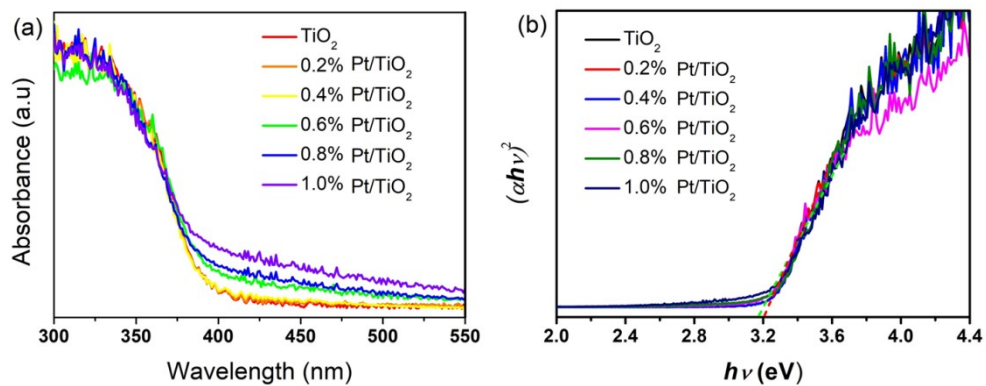

**Figure S14.** (a) UV-Vis spectra of Pt/TiO<sub>2</sub> photocatalysts loaded with various amount of Pt; (b) Bandgap of Pt/TiO<sub>2</sub> photocatalysts estimated by a related curve of  $(\alpha h\nu)^2$  versus photon energy. Although the Pt/TiO<sub>2</sub> samples exhibit poor visible light absorption, the bandgap Pt/TiO<sub>2</sub> photocatalysts does not show obvious red-shift as compared to that of bare TiO<sub>2</sub>. The bandgap of bare TiO<sub>2</sub> and the 0.4% Pt was estimated to be 3.20 (red line) and 3.17 eV (green line), respectively.

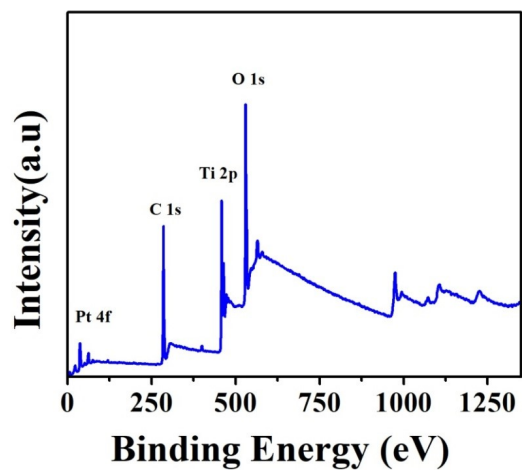

**Figure S15.** The survey XPS spectrum for 0.4% Pt/TiO<sub>2</sub> photocatalyst.

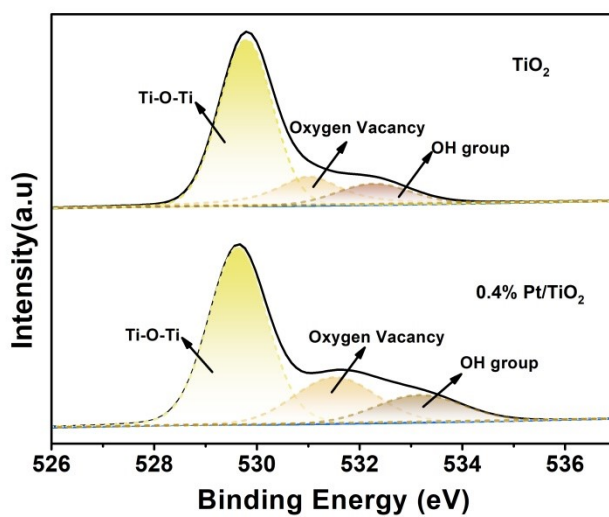

**Figure S16.** Comparison of high-resolution O 1s XPS spectra of 0.4% Pt/TiO<sub>2</sub> with bare TiO<sub>2</sub>.

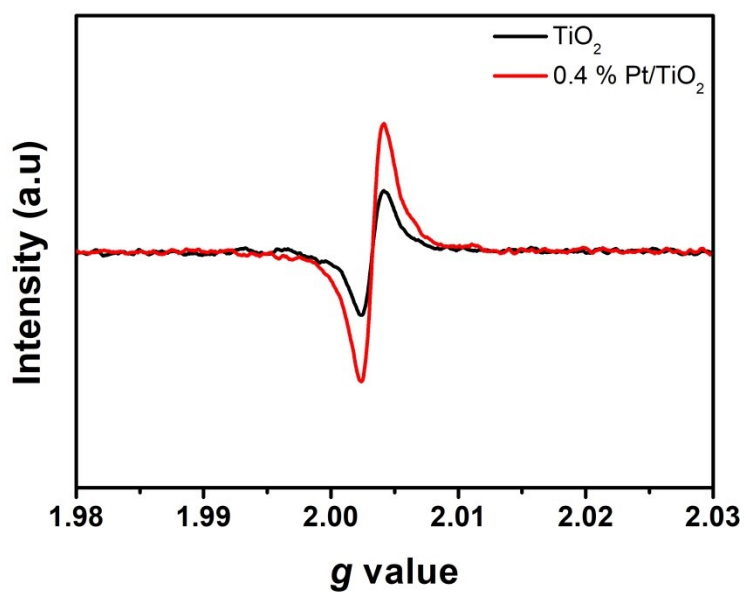

**Figure S17.** EPR spectra of TiO<sub>2</sub> and 0.4% Pt/TiO<sub>2</sub>.

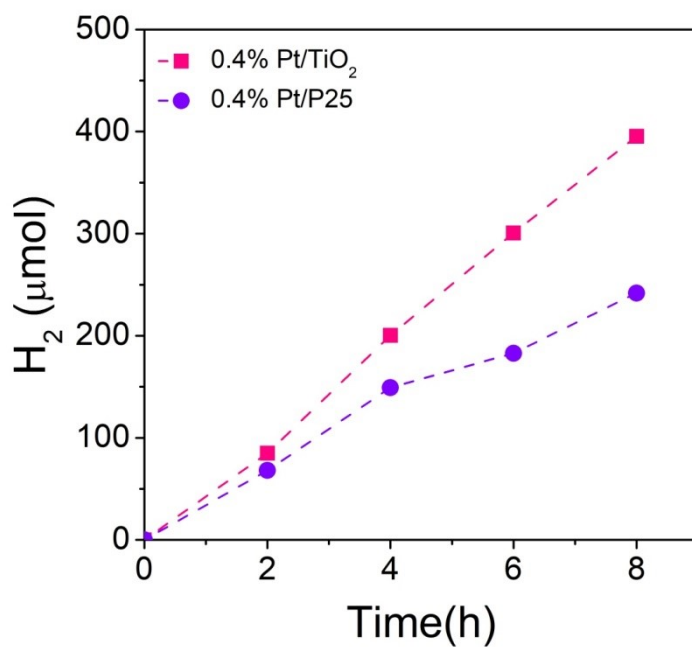

**Figure S18.** Comparison of photocatalytic H<sub>2</sub> generation activity of 0.4 Pt/TiO<sub>2</sub> photocatalyst with 0.4% Pt/P25 sample. Photocatalytic reaction conditions: 100 mg photocatalyst, 300 W Xe lamp, 1g  $\alpha$ -cellulose, 250 ml water.



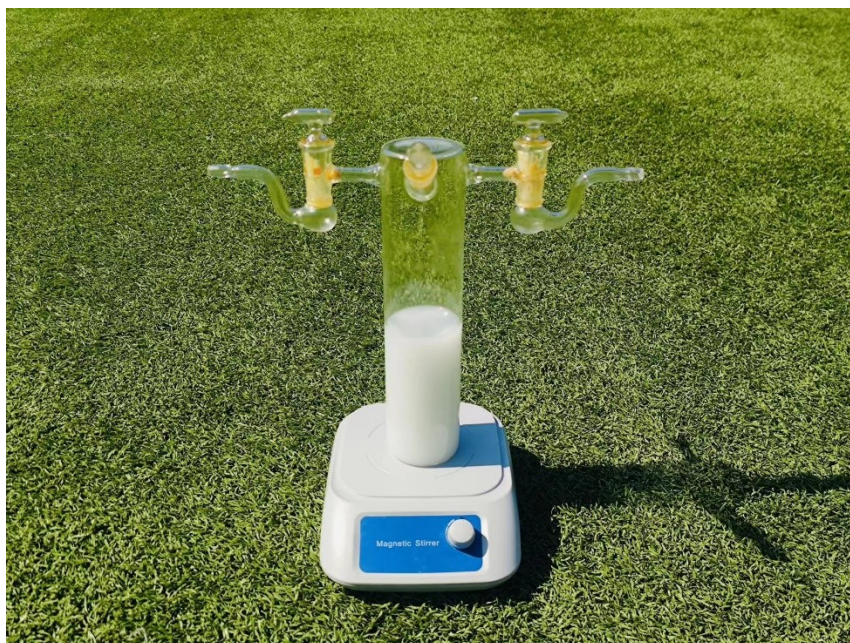

**Figure S19.** Photograph of photocatalytic experiment conducted by using sunlight as light source.

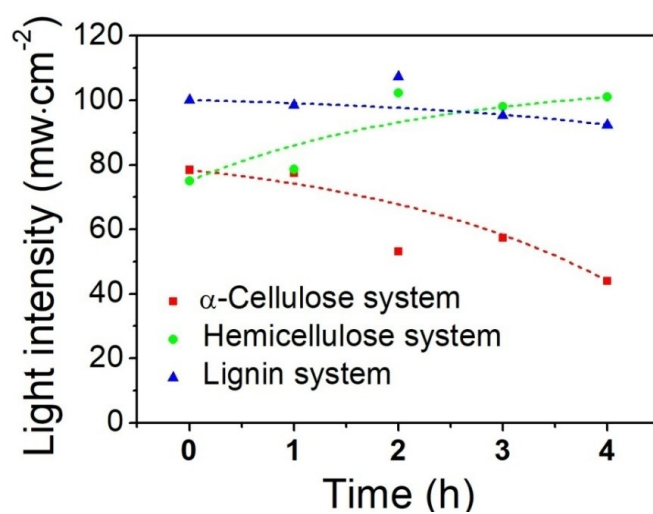

**Figure S20.** Light intensity of sunlight outdoors for photocatalytic H<sub>2</sub> production in a  $\alpha$ -cellulose, hemicellulose, lignin system corresponding to Figure 4c.

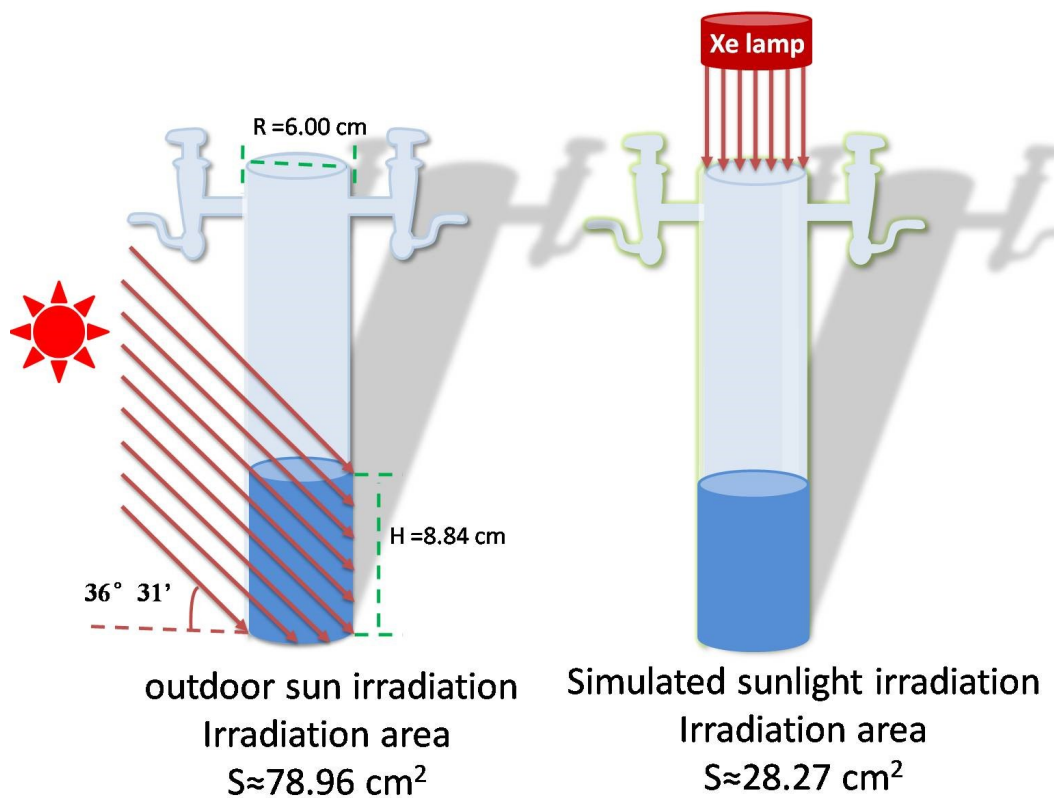

**Figure S21.** Schematic diagram of irradiation area under simulated sunlight irradiation and outdoor sun irradiation. For simulated sunlight irradiation, the light power was 2827 mW ( $28.27 \text{ cm}^2 \times 100 \text{ mw} \cdot \text{cm}^2$ ), for outdoor sun irradiation, the light power ranged from 4959 ( $78.96 \text{ cm}^2 \times 62.8 \text{ mw} \cdot \text{cm}^2$ ) to 7795 mW ( $78.96 \text{ cm}^2 \times 98.72 \text{ mw} \cdot \text{cm}^2$ ) when the averaged light intensity was ranged from 62.8 to 98.72  $\text{mw} \cdot \text{cm}^2$  estimate from Figure S22.



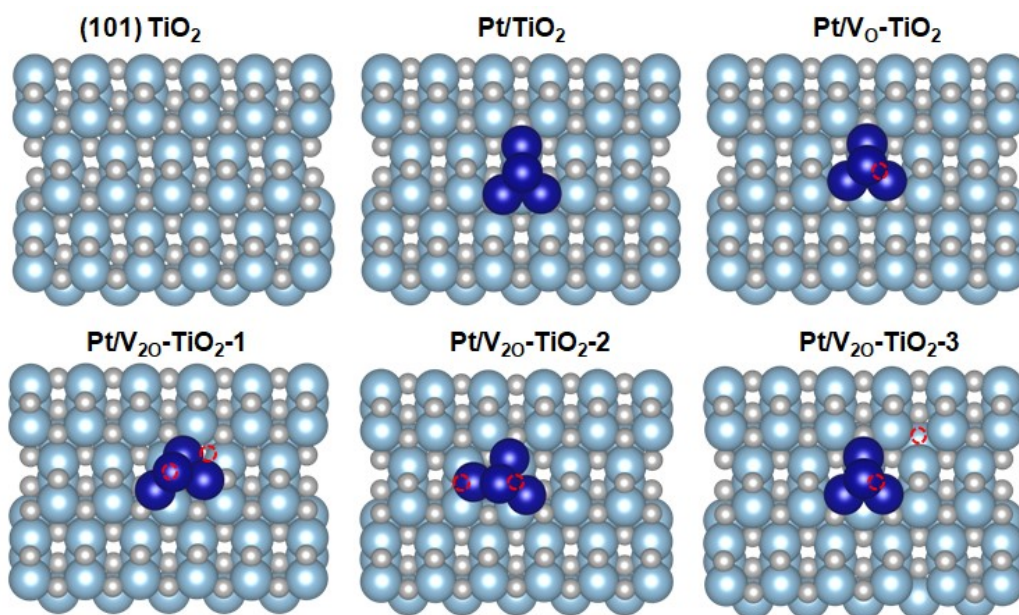

**Figure S22.** Structural models of TiO<sub>2</sub> (101) surface, Pt/TiO<sub>2</sub>, Pt/V<sub>O</sub>-TiO<sub>2</sub>, Pt/V<sub>20</sub>-TiO<sub>2</sub>-1, Pt/V<sub>20</sub>-TiO<sub>2</sub>-2, and Pt/V<sub>20</sub>-TiO<sub>2</sub>-3. The location of the O-vacancies is marked by dashed red circles.

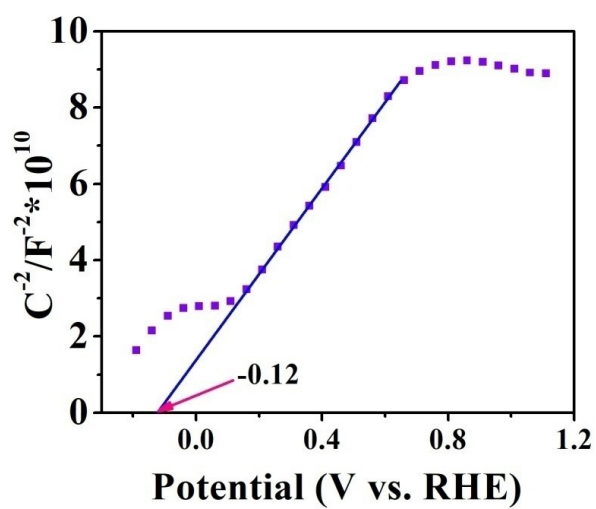

**Figure S23.** Mott-Schottky plots of TiO<sub>2</sub> electrode measured in Na<sub>2</sub>SO<sub>4</sub> aqueous solution.

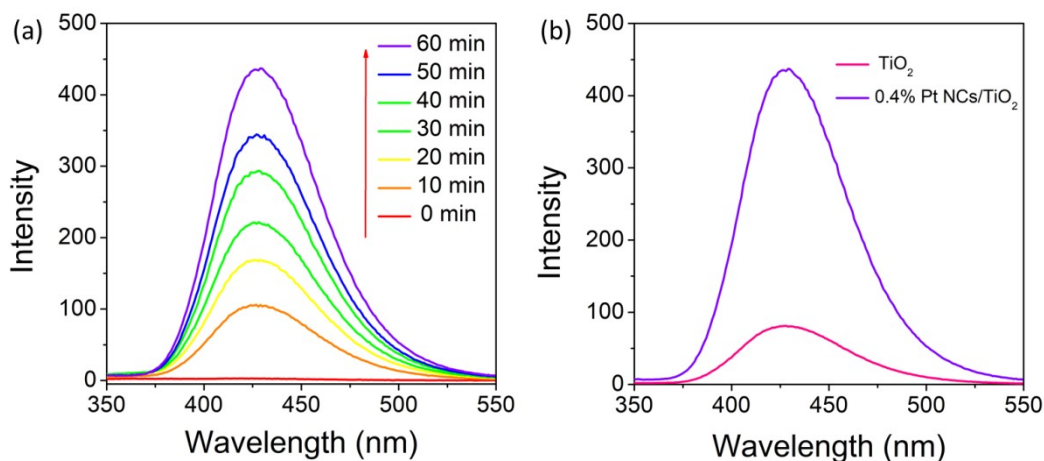

**Figure S24.** (a) PL spectrum of TAOH collected from the photocatalytic system in the presence of 0.4% Pt NCs/TiO<sub>2</sub> after different irradiation time. (b) Comparison of PL spectrum of TAOH collected from the photocatalytic system in the presence of bare TiO<sub>2</sub> and 0.4% Pt NCs/TiO<sub>2</sub> after 1 h of irradiation.

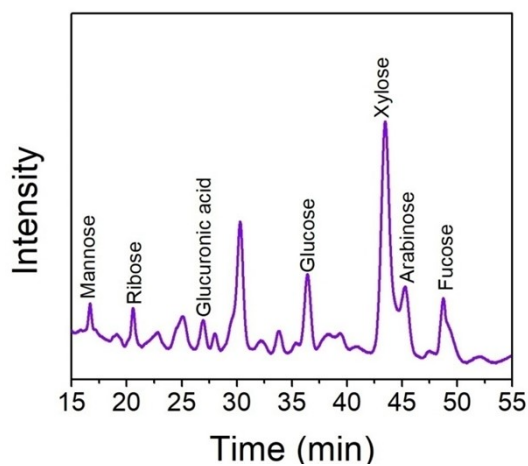

**Figure S25.** Liquid chromatography analysis for the sugar species as the decomposition products of  $\alpha$ -cellulose after photocatalytic H<sub>2</sub> production reaction.

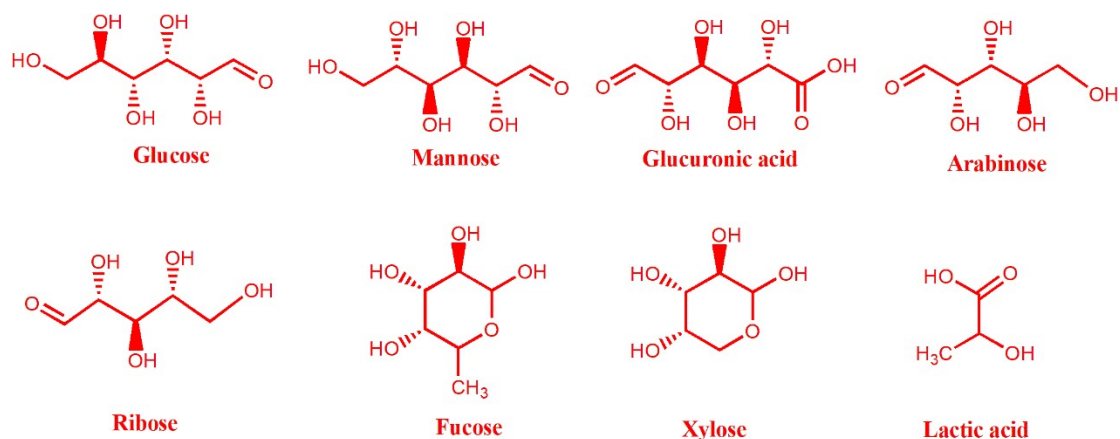

**Figure S26.** Chemical structure of decomposition products from  $\alpha$ -cellulose after photocatalytic  $H_2$  production reaction.

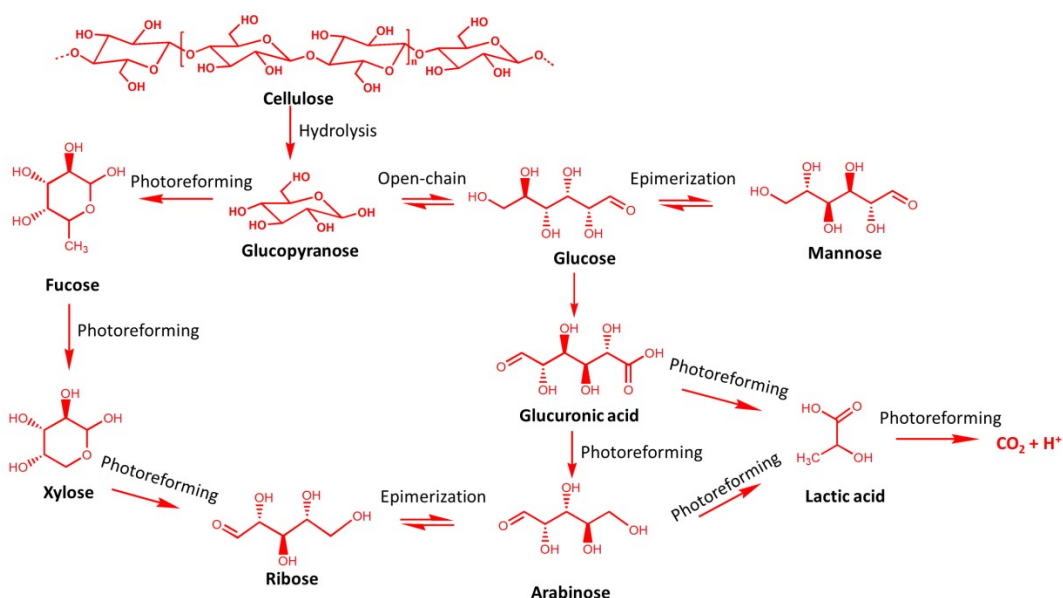

**Figure S27.** Possible reaction mechanism for photocatalytic decomposition of  $\alpha$ -cellulose. The cleavage of  $\beta$ -1,4-glycosidic bonds of  $\alpha$ -cellulose could be realized by realized  $\cdot OH$  radical during photocatalytic reaction, leading to formation of glucopyranose or glucose. And then the glucose could be converted small organic molecules even  $CO_2$  by the  $\cdot OH$  radical or photogenerated hole.

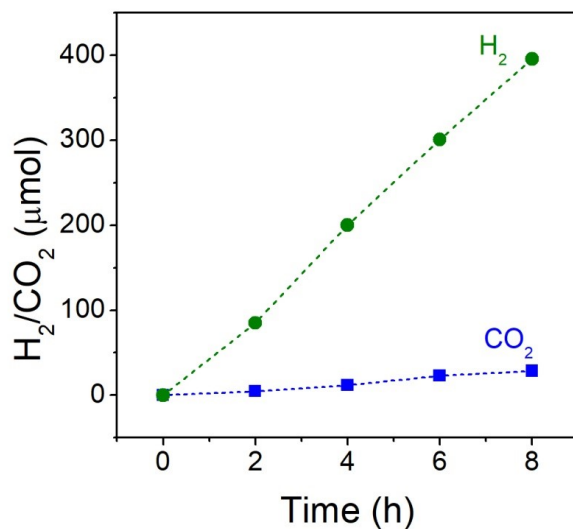

**Figure S28.** Comparison of photocatalytic H<sub>2</sub> and CO<sub>2</sub> generation over 0.4 Pt/TiO<sub>2</sub> photocatalyst. Photocatalytic reaction conditions: 100 mg photocatalyst, 300 W Xe lamp, 1g  $\alpha$ -cellulose, 250 ml water.

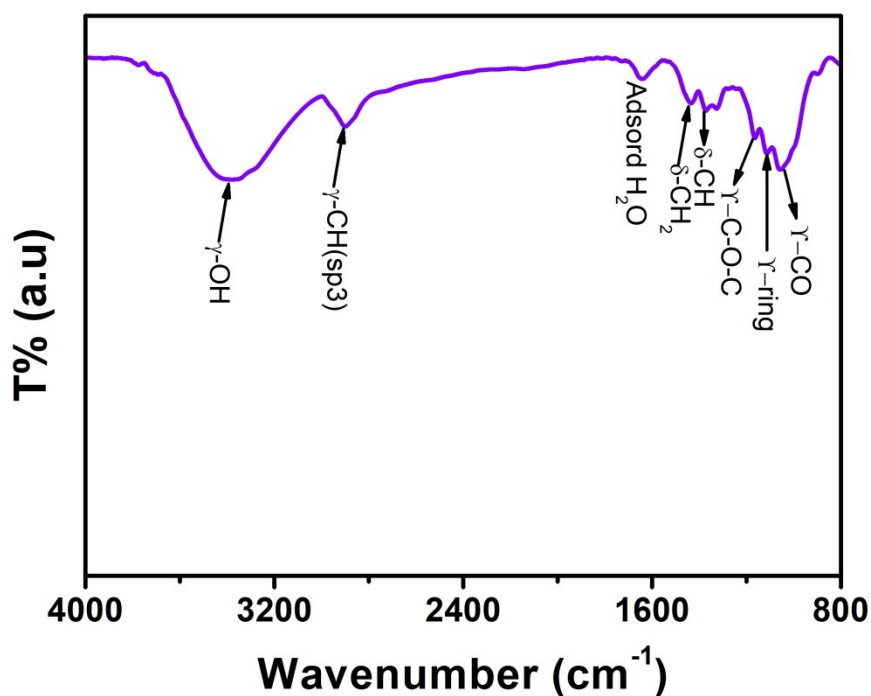

**Figure S29.** FT-IR spectra of residual  $\alpha$ -cellulose after photocatalytic H<sub>2</sub> production reaction. It is obviously that residual  $\alpha$ -cellulose exhibits surface groups of  $\delta$ -C-OH,  $\gamma$ -CO,  $\gamma$ -ring,  $\gamma$ -C-O-C,  $\delta$ -CH,  $\delta$ -CH<sub>2</sub>,  $\gamma$ -CH(sp<sub>3</sub>),  $\gamma$ -OH, indicating that the surface of  $\alpha$ -cellulose was constantly oxidizing during the photocatalytic reaction.

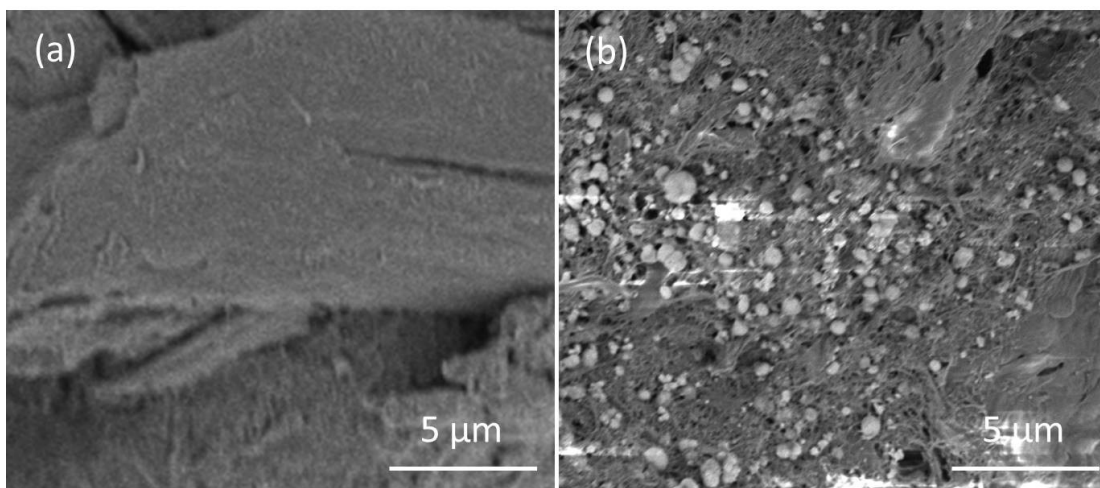

**Figure S30.** SEM images of fresh  $\alpha$ -cellulose (a) and residual  $\alpha$ -cellulose collected from photocatalytic  $\text{H}_2$  production reaction (b).

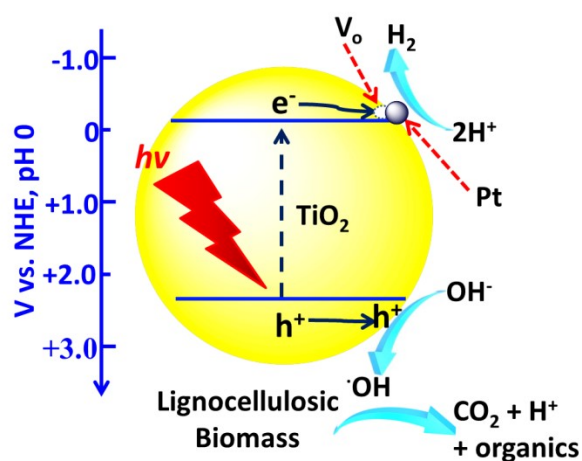

**Figure S31.** Schematic diagram of photocatalytic  $\text{H}_2$  production from lignocellulosic biomass over Pt/ $\text{TiO}_2$  photocatalyst. Because the oxygen vacancy on the  $\text{TiO}_2$  surface benefits the charge transfer across the Pt- $\text{TiO}_2$  interface as confirmed by DFT calculation, the photoexcited electrons in the CB of  $\text{TiO}_2$  can rapidly transfer to Pt.

**Table S1.** Comparison of photocatalytic performance for H<sub>2</sub> production between the current work and other reported studies.

| Entry | Photocatalyst                         | Sacrificial reagent. | Light source | H <sub>2</sub> evolution rate (umol·h <sup>-1</sup> ·g <sup>-1</sup> ) | AQY(%)        | ref       |
|-------|---------------------------------------|----------------------|--------------|------------------------------------------------------------------------|---------------|-----------|
| 1     | RuO <sub>2</sub> /Pt/TiO <sub>2</sub> | cellulose            | Xe lamp      | 41                                                                     |               | 10        |
| 2     | Pt/P25                                | cellulosic           | AM 1.5       | 129                                                                    | -             | 11        |
| 3     | Pt/P25                                | rice husk suspension | AM 1.5       | 62.5                                                                   | -             | 12        |
| 4     | Pt/TiO <sub>2</sub>                   | Cherry wood          | Xe lamp      | 49                                                                     | 1.1           | 12        |
| 5     | Pt/P25                                | celluloses           | Xe lamp      | ~230                                                                   | -             | 13        |
| 6     | MoS <sub>2</sub> /TiO <sub>2</sub>    | cellulose            | Xe lamp      | 201                                                                    | 1.45(380 nm)  | 14        |
| 7     | Pt/TiO <sub>2</sub>                   | cellulose            | UV-lamp      | 133                                                                    |               | 15        |
| 8     | Pt/TiO <sub>2</sub> NSs               | cellulose            | Xe lamp      | 275                                                                    | 1.47 (380 nm) | 16        |
| 9     | Pt/Cu-TiO <sub>2</sub>                | cellulose            | Hg lamp      | 510                                                                    |               | 17        |
| 10    | NiO <sub>x</sub> //TiO <sub>2</sub>   | cellulose            | Hg lamp      | 270                                                                    |               | 18        |
| 8     | Pt/TiO <sub>2</sub>                   | cellulose            | Xe lamp      | 494                                                                    | 3.21 (380 nm) | This work |

## References

1. G. Kresse, Furthmüller. *J. Phys. Rev. B* 1996, **54**, 11169.
2. G. J. Kresse, Furthmüller. *J. Comput. Phys. Sci.* 1996, **6**, 15-50.
3. J. P. Perdew, Burke, M. K. Ernzerhof. *Phys. Rev. Lett.* 1996, **77**, 3865-3868.
4. S. Grimme. *J. Comput. Chem.* 2006, **27**, 1787-1799.
5. P. E. Blöchl. *Phys. Rev. B*, 1994, **50**, 17953.
6. G. Kresse, D. Joubert. *Phys. Rev. B*, 1999, **59**, 1758.
7. M. R. Hestenes, E. Stiefel. *J. Res. Natl. Bur. Stand.* 1952, **49**, 409.
8. H. J. Monkhorst, J. D. Pack. *Phys. Rev. B*. 1976, **13**, 5188.
9. V. Wang, N. Xu, J. C. Liu, G. Tang, W. T. Geng. *Comput. Phys. Commun.* 2012, **267**, 108033.
10. T. Kawai, T. Sakata. *Nature* 1980, **286**, 474-476.
11. A. Speltini. *Photoch. Photobio. Sci.* 2014, **13**, 1410-1419.
12. M. R. S. John, A. J. Furgala, A. F. Sammells. *J. Phys. Chem.* 1983, **87**, 801-805.
13. A. Caravaca, W. Jones, C. Hardacre, M. Bowker. *Proc. R. Soc. A.* 2016, **472**, 20160054.
14. P. Wang, Y. J. Yuan, Q. Y. Liu, Q. Cheng, Z. K. Shen, Z. T. Yu, Z. G. Zou. *ChemSusChem* 2021, **14**, 2860-2865.
15. L. Lan, Y. Shao, Y. Jiao, R. Zhang, C. Hardacre, X. L. Fan. *Chin. J. Chem. Eng.*, 2020, **28**, 2084-2091.

16. Q. Cheng, Y. J. Yuan, R. Tang, Q. Y. Liu, L. Bao, P. Wang, J. S. Zhong, Z. Y. Zhao, Z. T. Yu, Z. G. Zou. *ACS Catal.* 2022, **12**, 2118-2125.
17. S. Belda-Marco, M. A. Lillo-Ródenas, M. C. Román-Martínez, *Catal. Today* 2023, **413**, 113945.
18. L. Zhang, W. Wang, S. Zeng, Y. Su, H. Hao, *Green Chem.* 2018, **20**, 3008-3013.
